# Supplementary material for: miR-34a and IRE1A/XBP-1(S) Form a Double-Negative Feedback Loop to Regulate Hypoxia-Induced EMT, Metastasis, Chemo-Resistance and Autophagy
Source: MDPI journal article supplement (doi:10.3390/cancers15041143), 2023-02-10
Supplement: s1 [file s1]

## Supplementary Information

# miR-34a and IRE1A/XBP-1(S) Form a Double-Negative Feedback Loop to Regulate Hypoxia-Induced EMT, Metastasis, Chemo-Resistance and Autophagy

Nassim Bouznad, Matjaz Rokavec, Meryem Gülfem Öner and Heiko Hermeking

### Inventory of Supplementary Information

- **Supplemental Figure S1**
- **Supplemental Figure S2**
- **Supplemental Figure S3:** Uncropped Western blot membranes
- **Supplemental Table S1:** Oligonucleotides used for qPCR
- **Supplemental Table S2:** List of antibodies
- **Supplemental Table S3:** Oligonucleotides used for qChIP
- **Supplemental Table S4:** Oligonucleotides used for cloning and mutagenesis of *XBP-1* and *IRE1A* 3'-UTRs
- **Supplemental Table S5:** Vectors used in this study

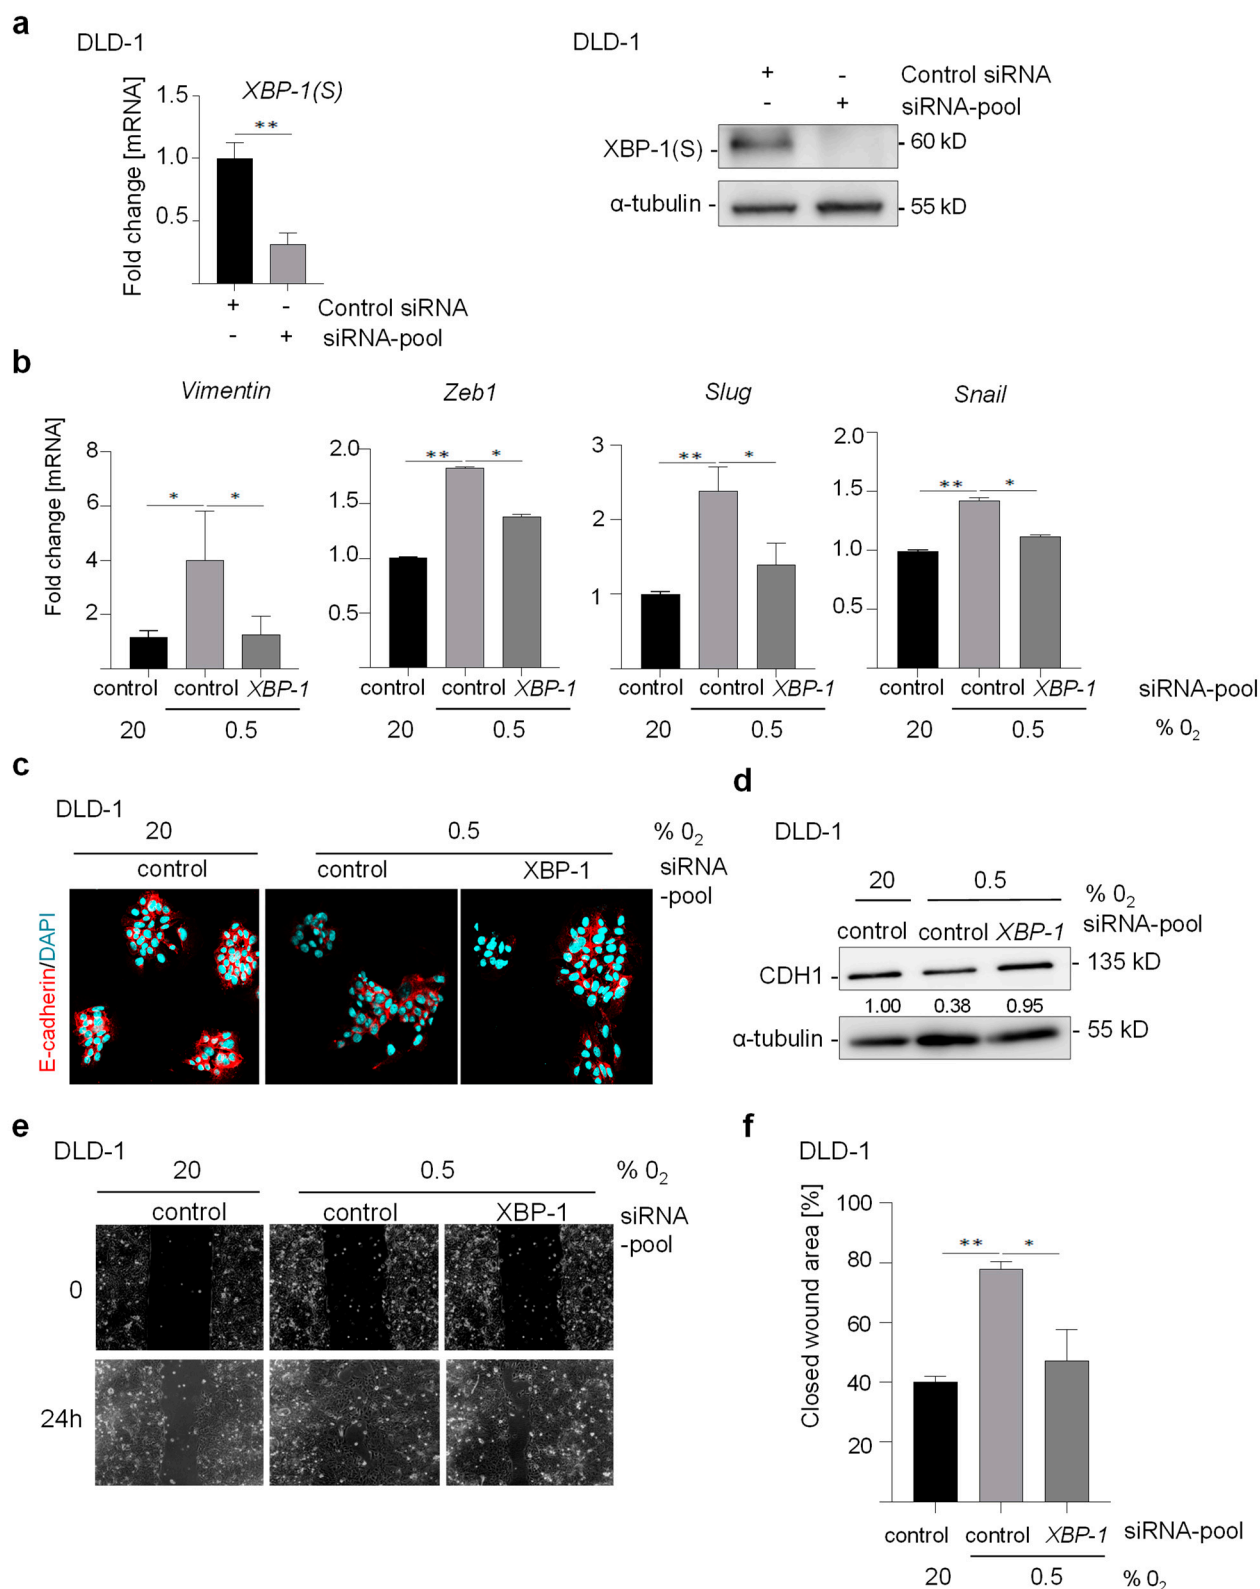

**Figure S1.** (a) qPCR analysis in DLD-1 cells transfected with *XBP-1* or control siRNAs Pool. (b) qPCR analysis in DLD-1 cells transfected with *XBP-1* or control siRNAs Pool and then cultured at 20% O<sub>2</sub> or 0.5% O<sub>2</sub> for 72 hours. (c-d) Indirect immunofluorescence detection and western blot analysis of *E-cadherin*/CDH1 in DLD-1 cells transfected with *XBP-1* or control siRNAs Pool and then cultured at 20% O<sub>2</sub> or 0.5% O<sub>2</sub>. (e-f) Densitometric representation and of the wound-healing assay done in DLD-1 cells transfected with *XBP-1* or control siRNAs Pool and then cultured at 20% O<sub>2</sub> or 0.5% O<sub>2</sub>. The normalized wound area was calculated using Image J software. In panel (a), (b), and (f) mean values  $\pm$  SD (n=3) are provided. (\*\*\*) p < 0.001, (\*\*) p < 0.01, (\*) p < 0.05.

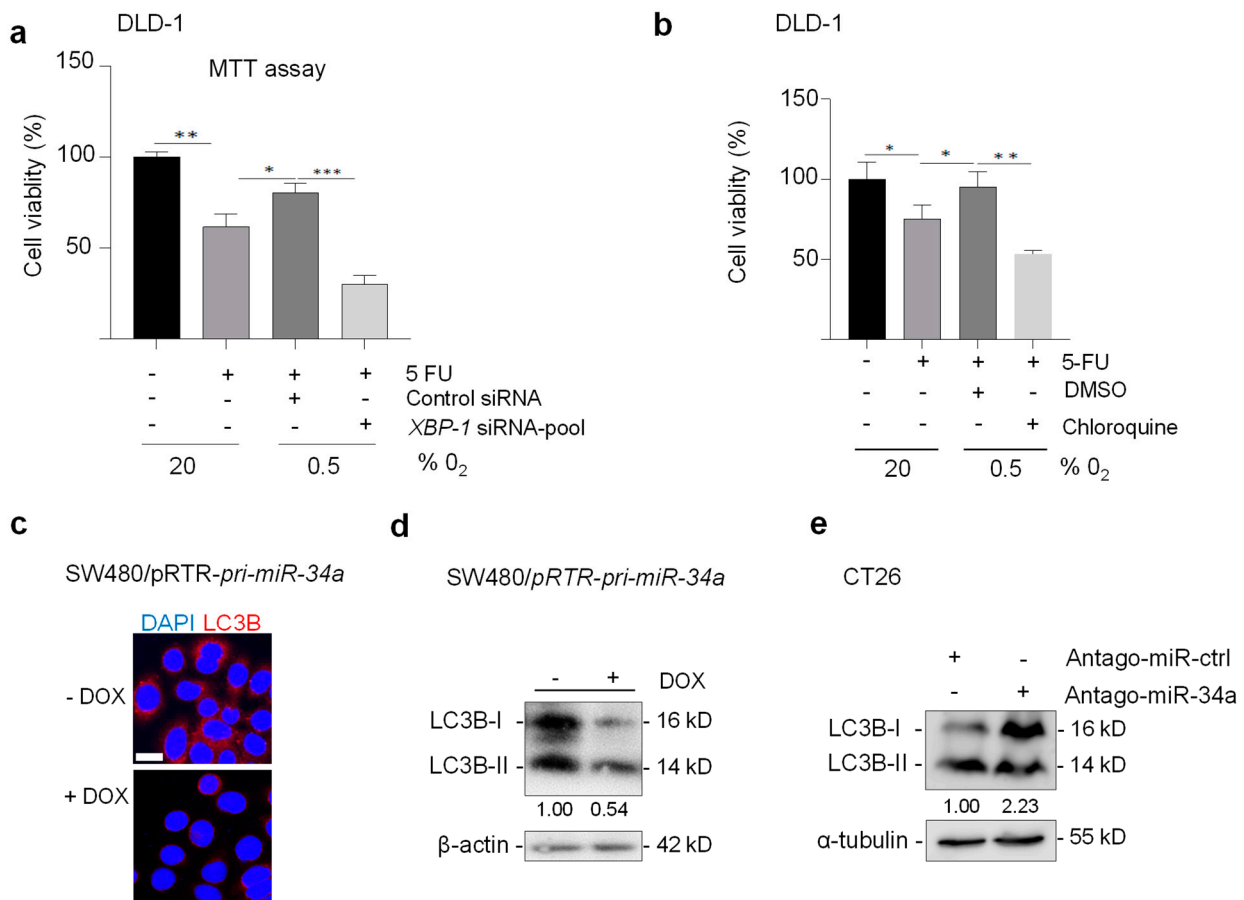

**Figure S2. (a)** MTT assay of DLD-1 cells transfected with *XBP-1* or control siRNAs Pool for 24 hours at 20.0% O<sub>2</sub>, then exposed to 0.5% O<sub>2</sub> for 48 hours, and subsequently treated with or without 5-FU for 72 hours. **(b)** MTT assay of DLD-1 cells treated with DMSO or chloroquine (20 μM) for 24 hours at 20.0% O<sub>2</sub>, then exposed to 0.5% O<sub>2</sub> for 48 hours, and subsequently treated with or without 5-FU for 72 hours. **(c-d)** Indirect immunofluorescence detection and western blot analysis of LC3B in SW480 cells harboring a pRTR/pri-miR-34a vector exposed to Doxycycline (DOX) for 48h. **(e)** Western blot analysis of LC3B in CT26 cells transfected with antago-miR-34a or antago-miR control oligonucleotides for 48 hours. In panel **(a)**, **(b)** mean values ± SD (n=3) are provided. (\*\*\*) p < 0.001, (\*\*) p < 0.01, (\*) p < 0.05.

Figure S3. Source data of Western blot analyses

Related to Figure 1b

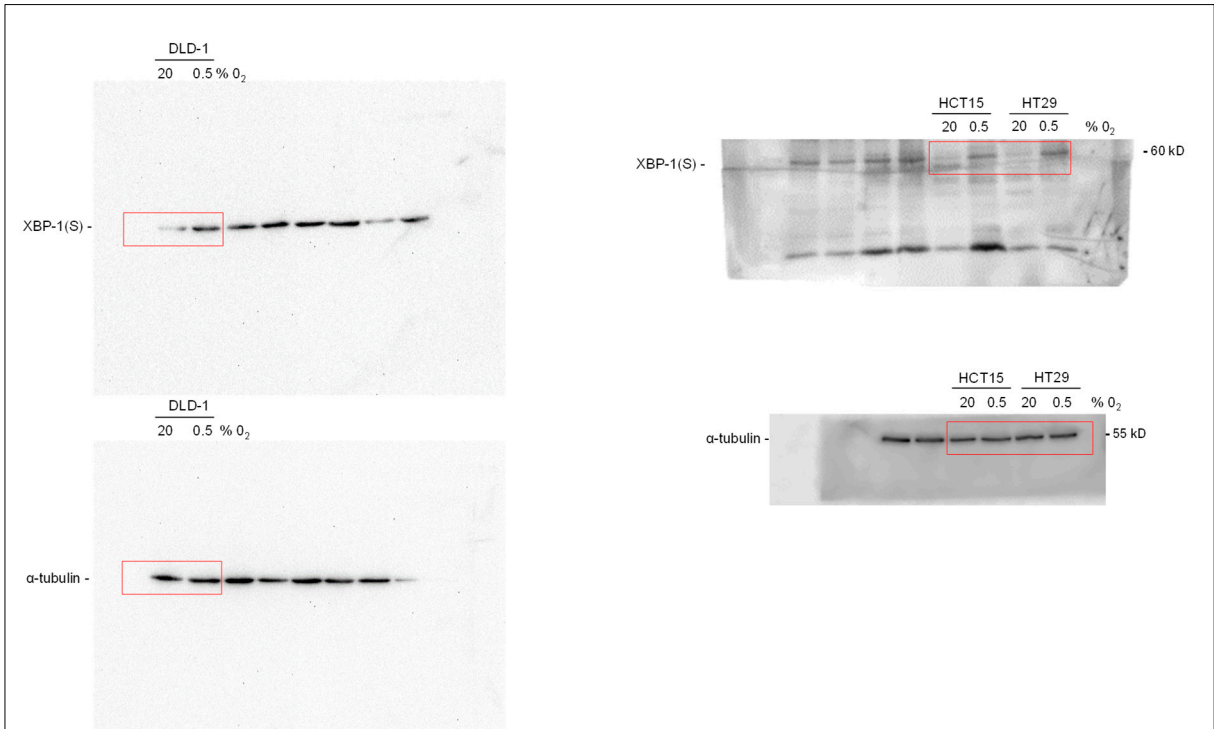

Related to Figure 1f

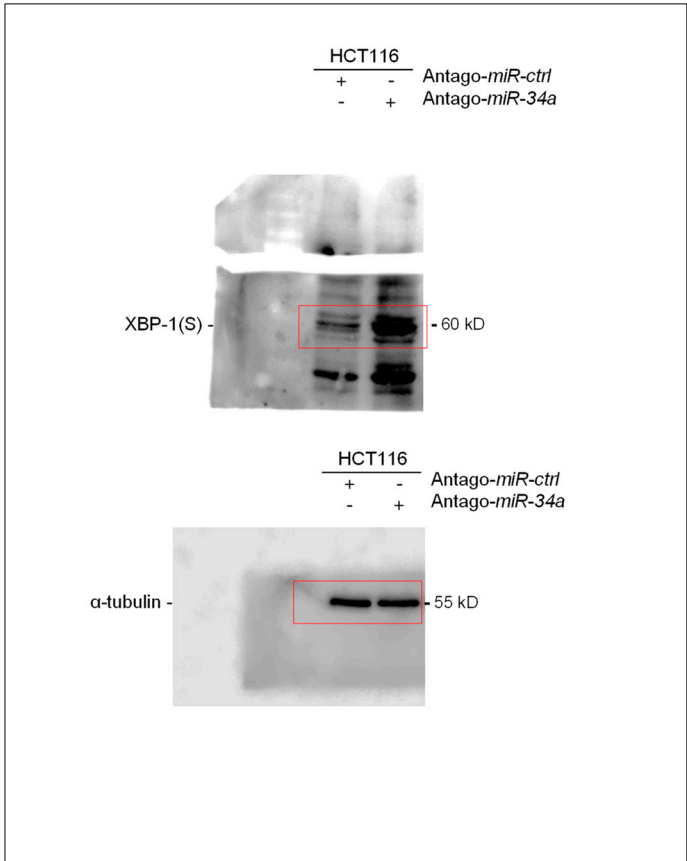

Related to Figure 1h

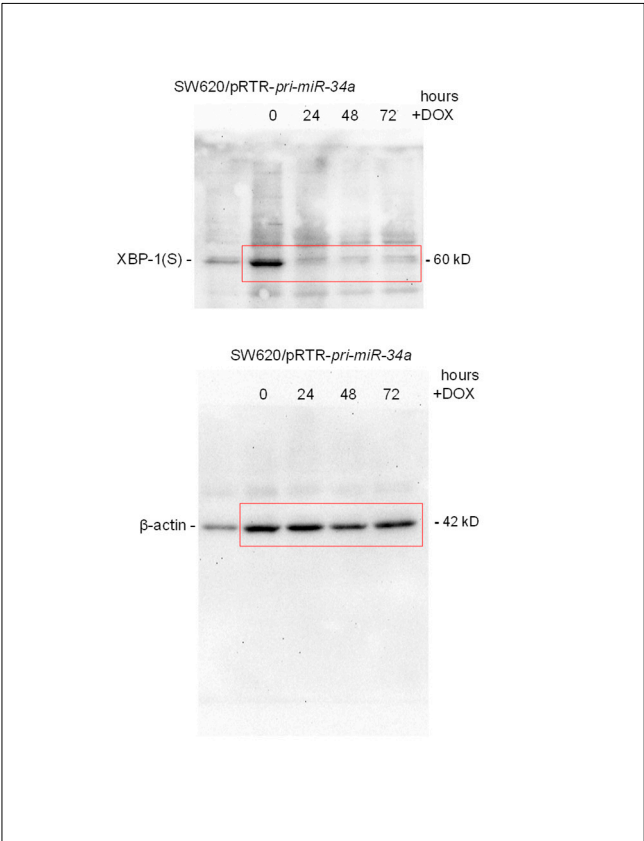

Related to Figure 1i

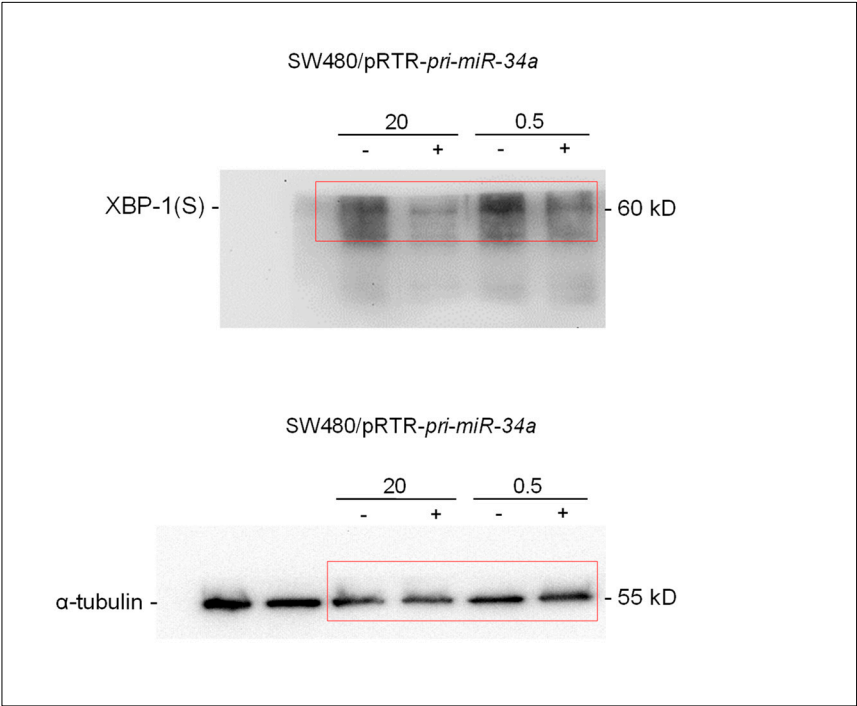

**Related to Figure 2a**

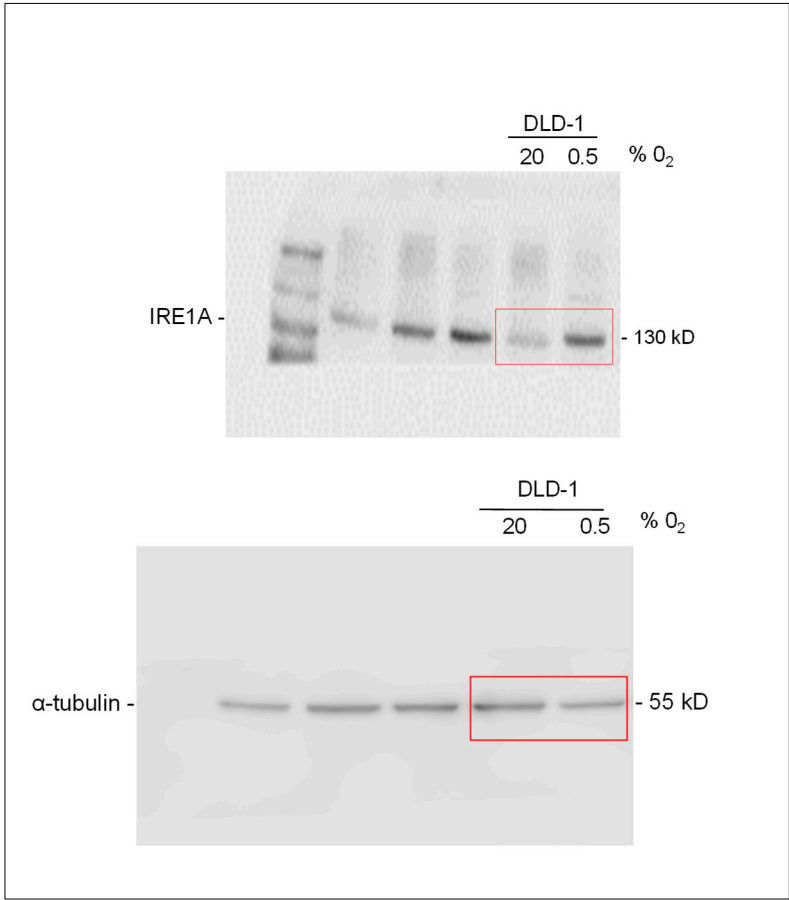

**Related to Figure 2c**

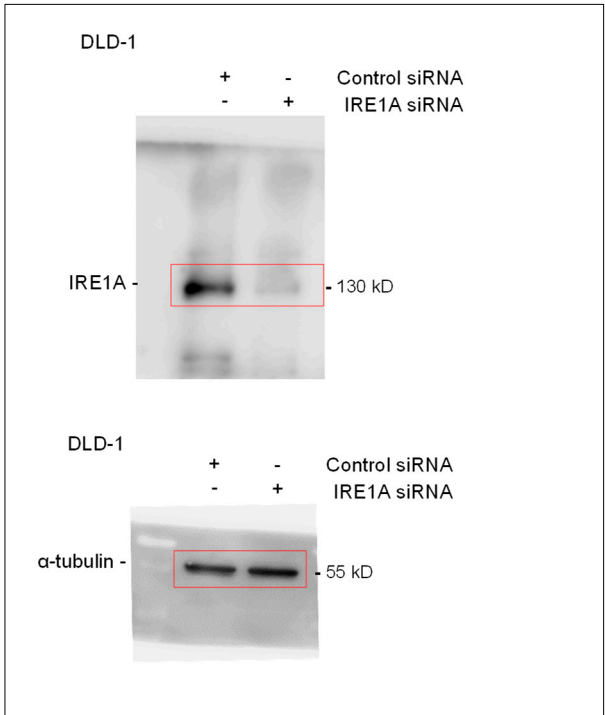

Related to Figure 2d

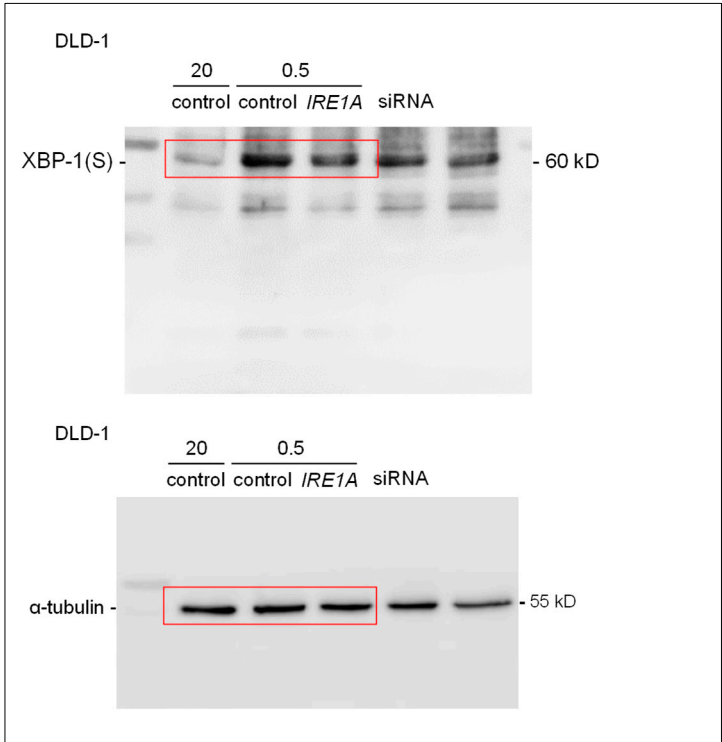

Related to Figure 2e

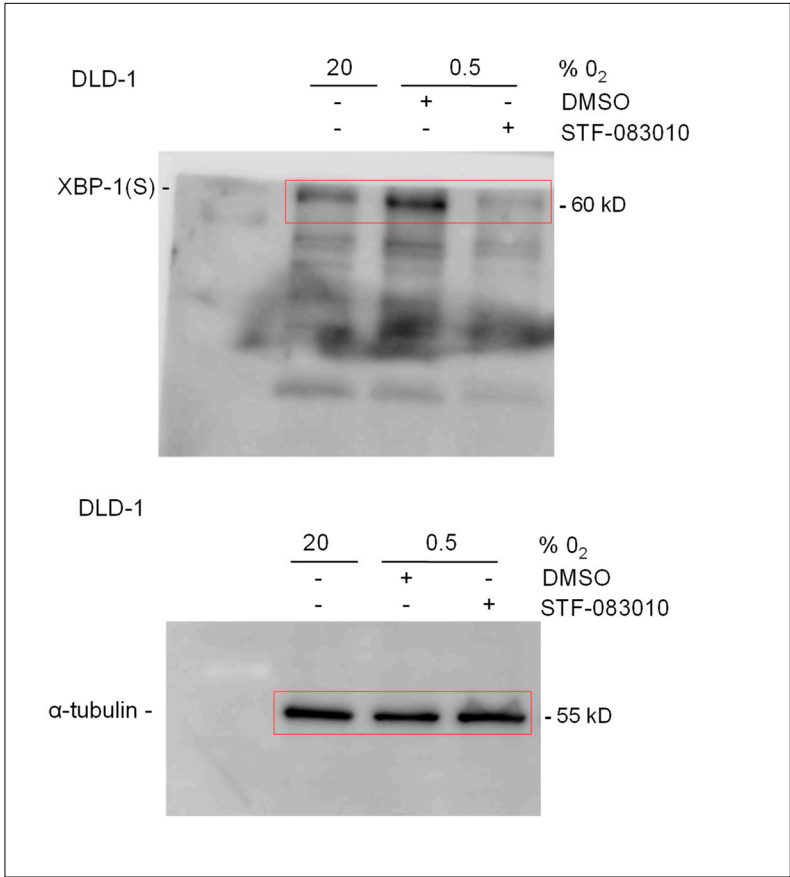

**Related to Figure 2i**

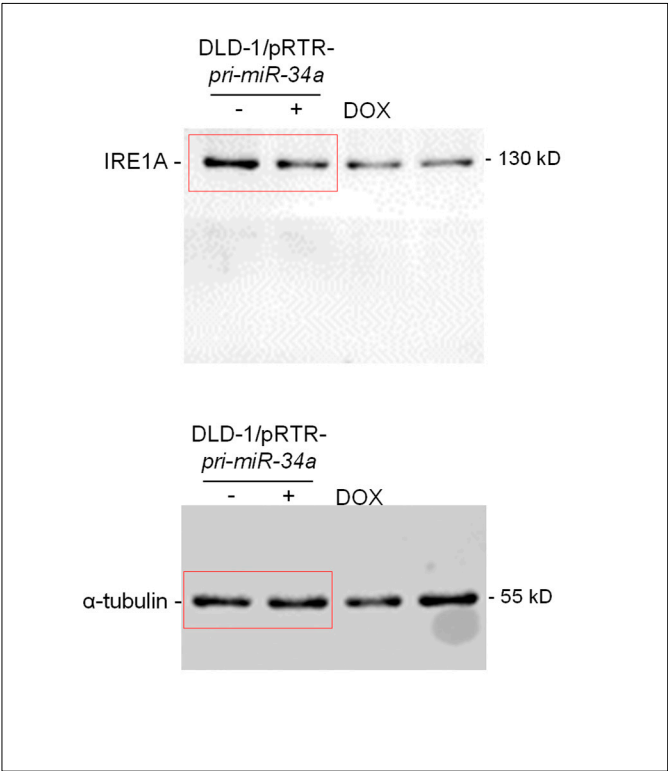

**Related to Figure 2j**

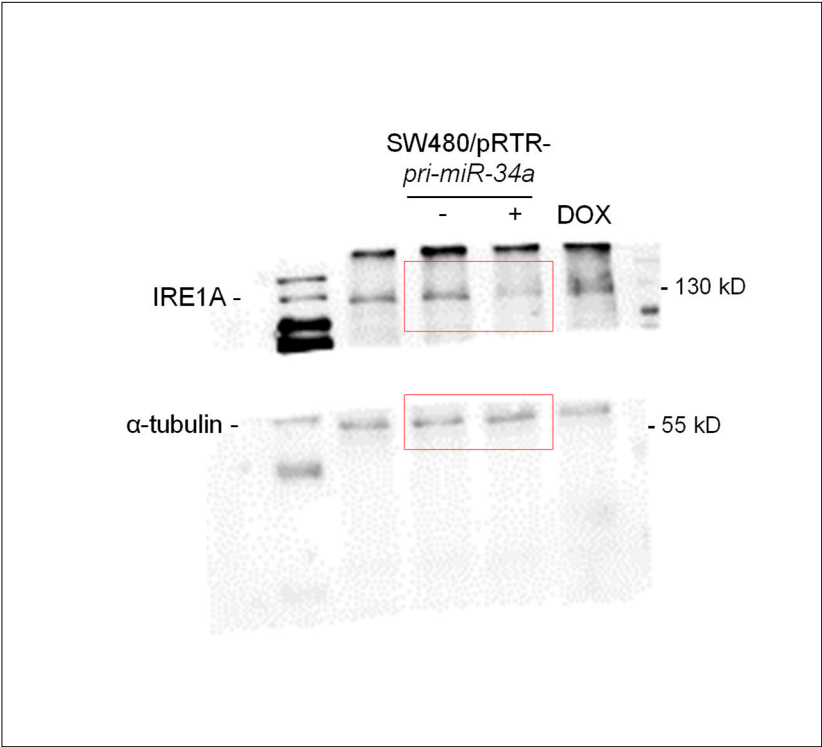



**Related to Figure 3a**

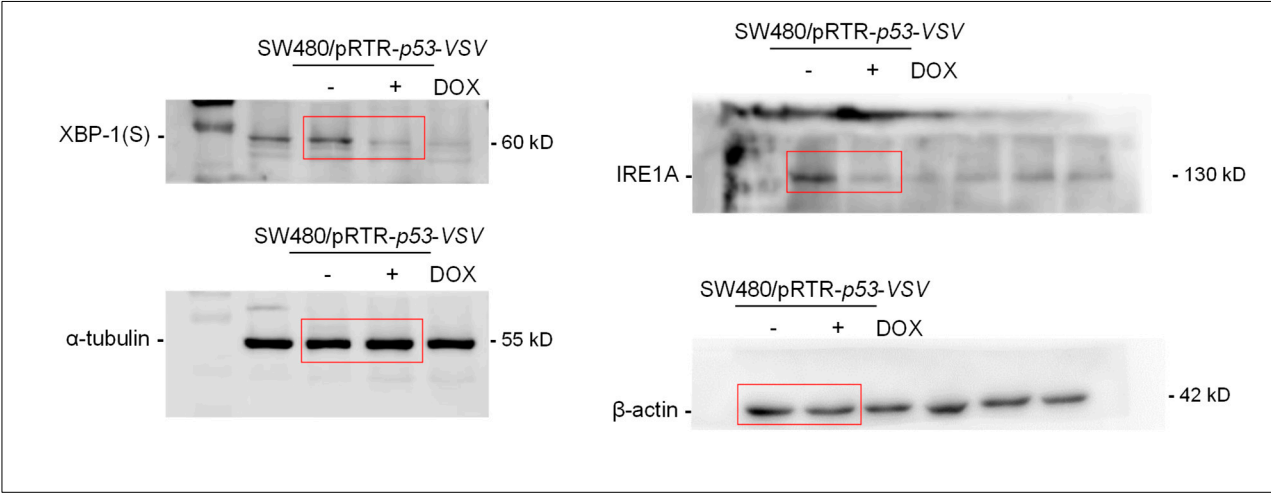

**Related to Figure 3c**

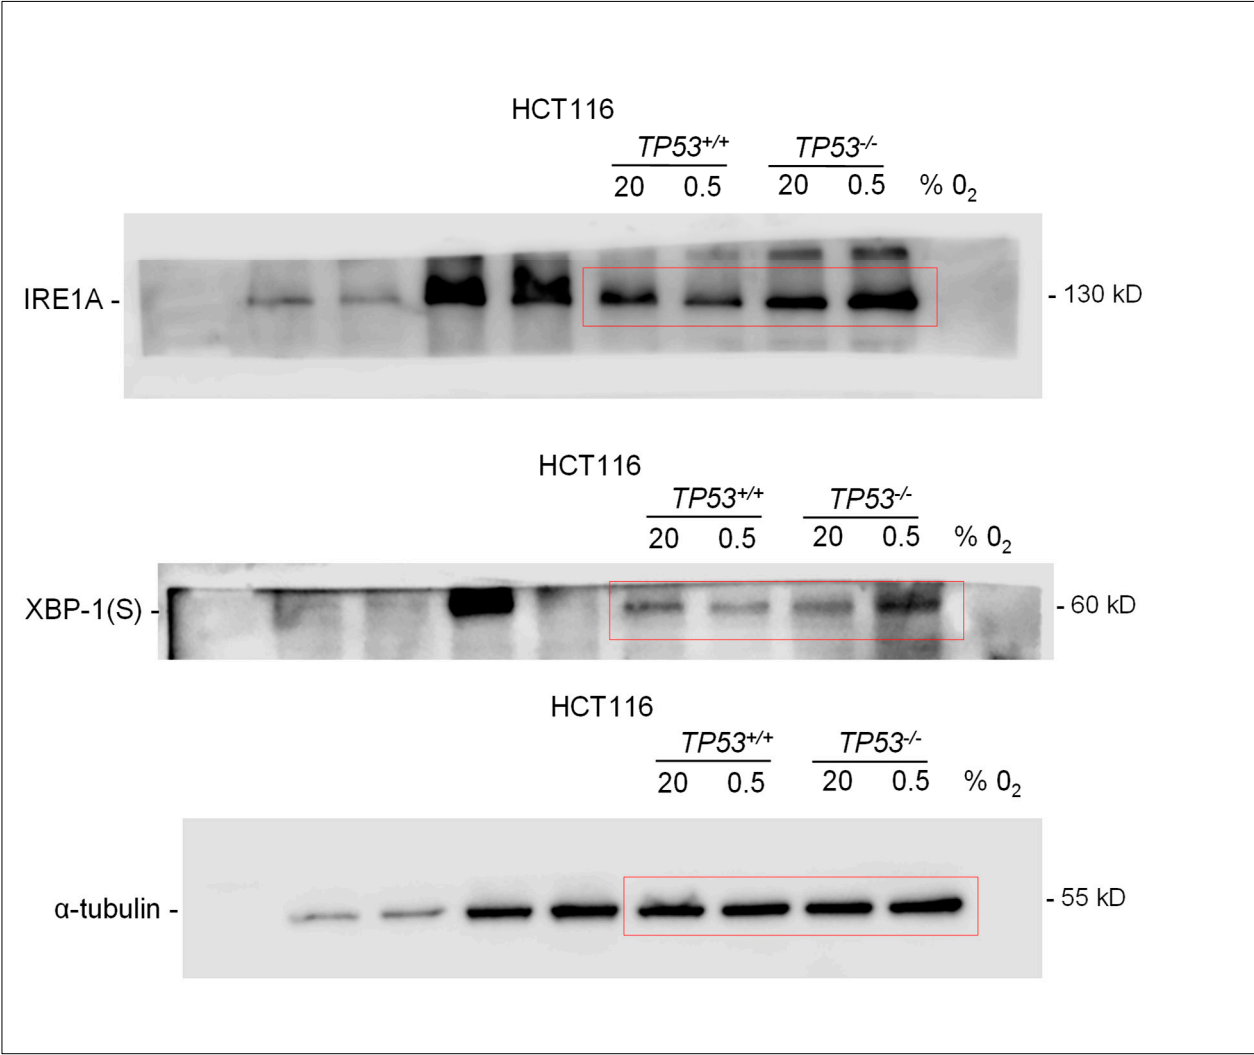

Related to Figure 3e

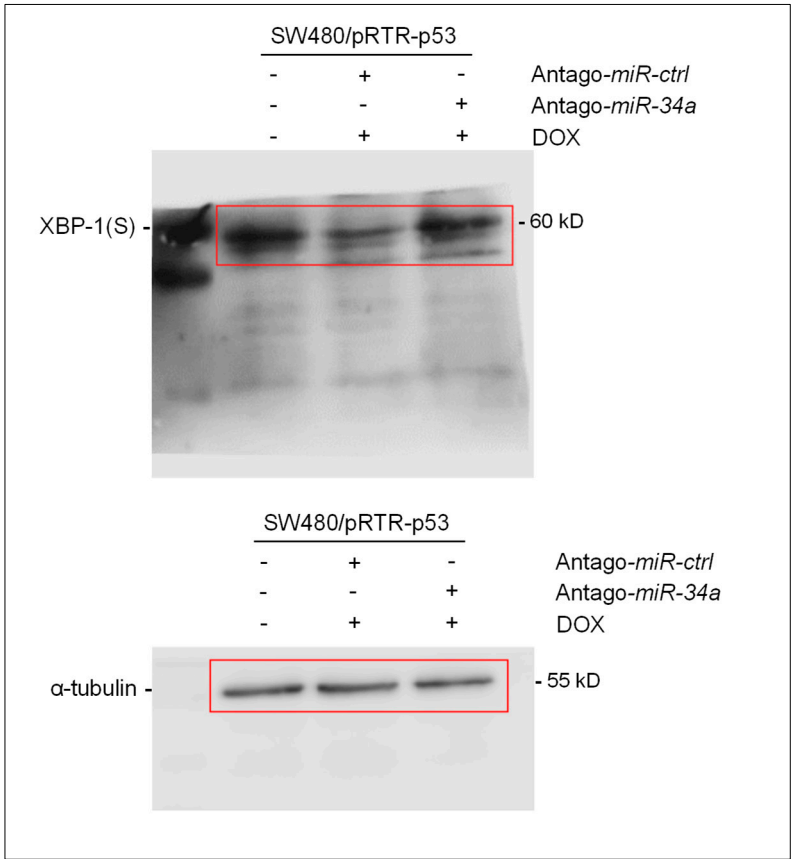

Related to Figure 3f

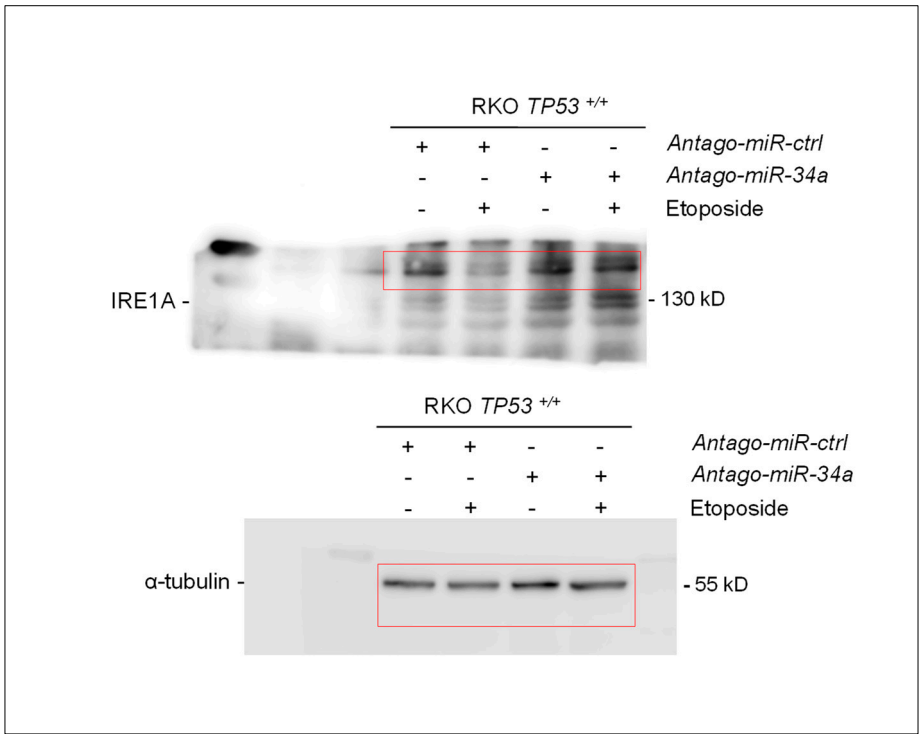

Related to Figure 4b

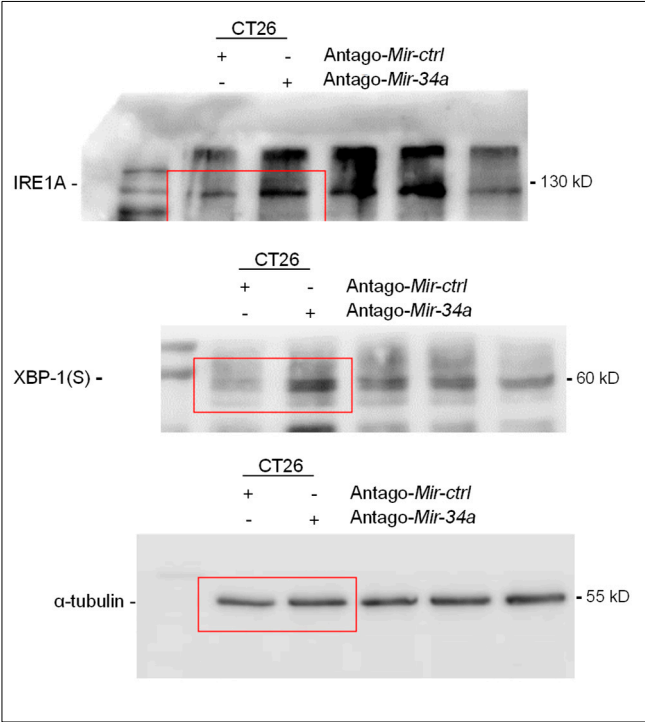

Related to Figure 4c

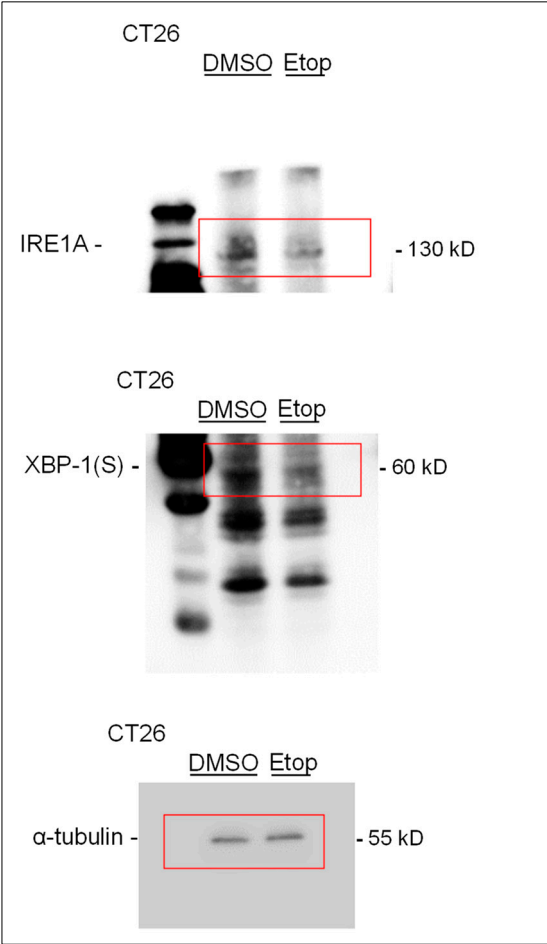

Related to Figure 4d

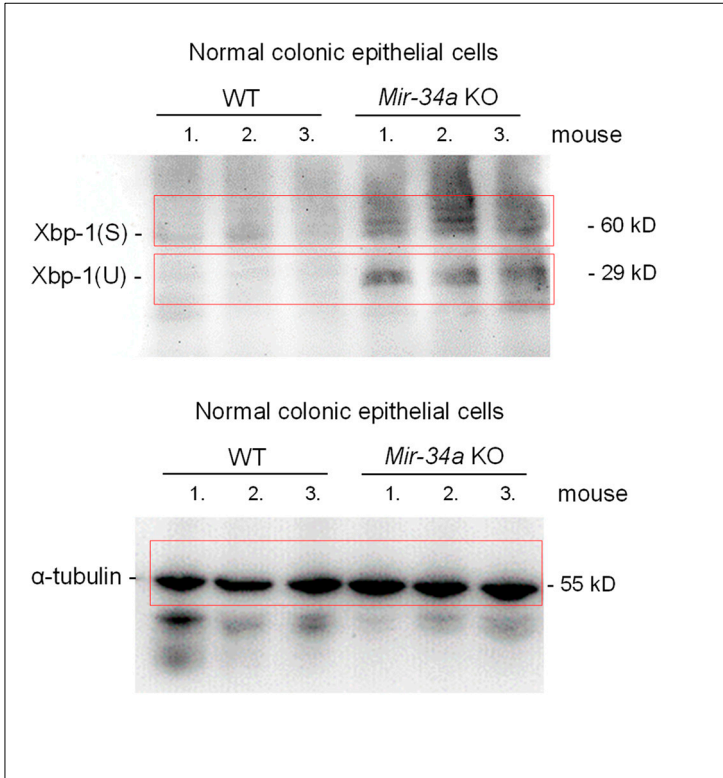

Related to Figure 4e

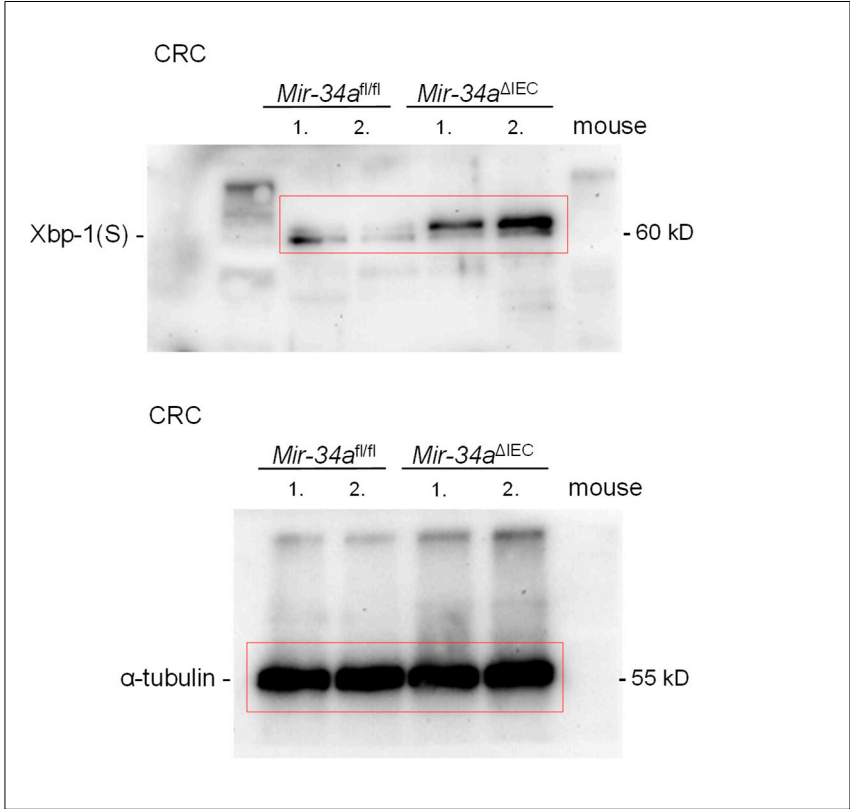

Related to Figure 5e

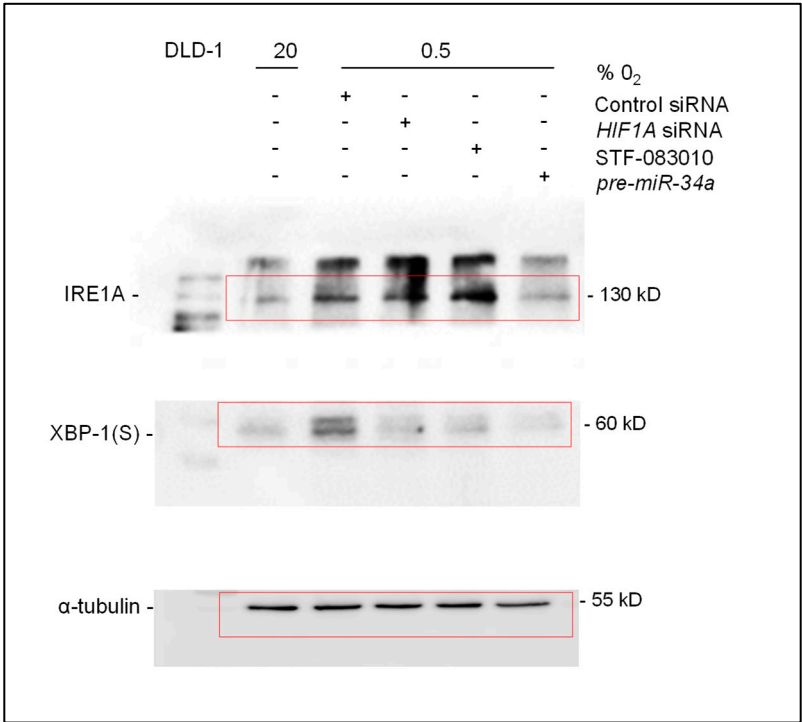

Related to Figure 7a

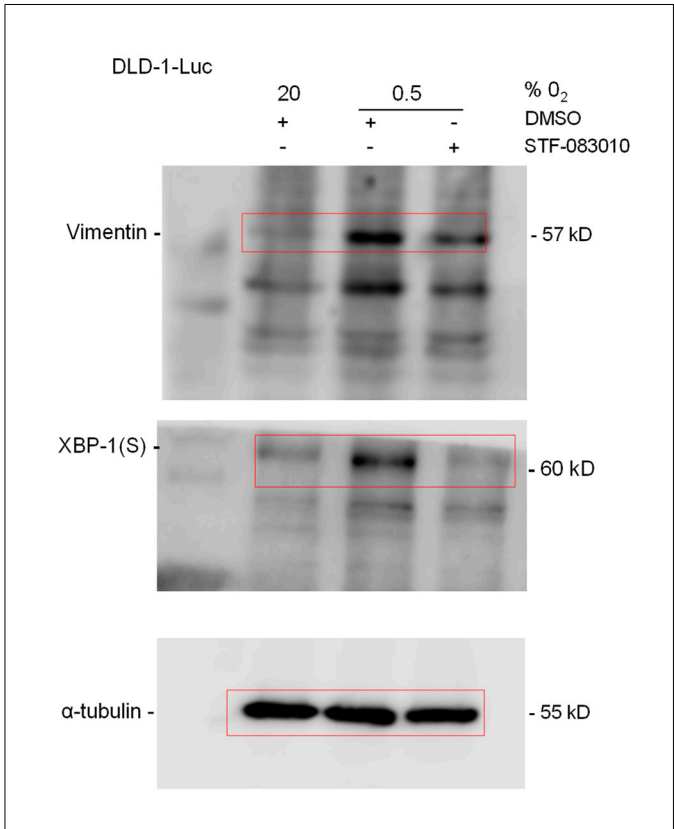

Related to Figure 8f

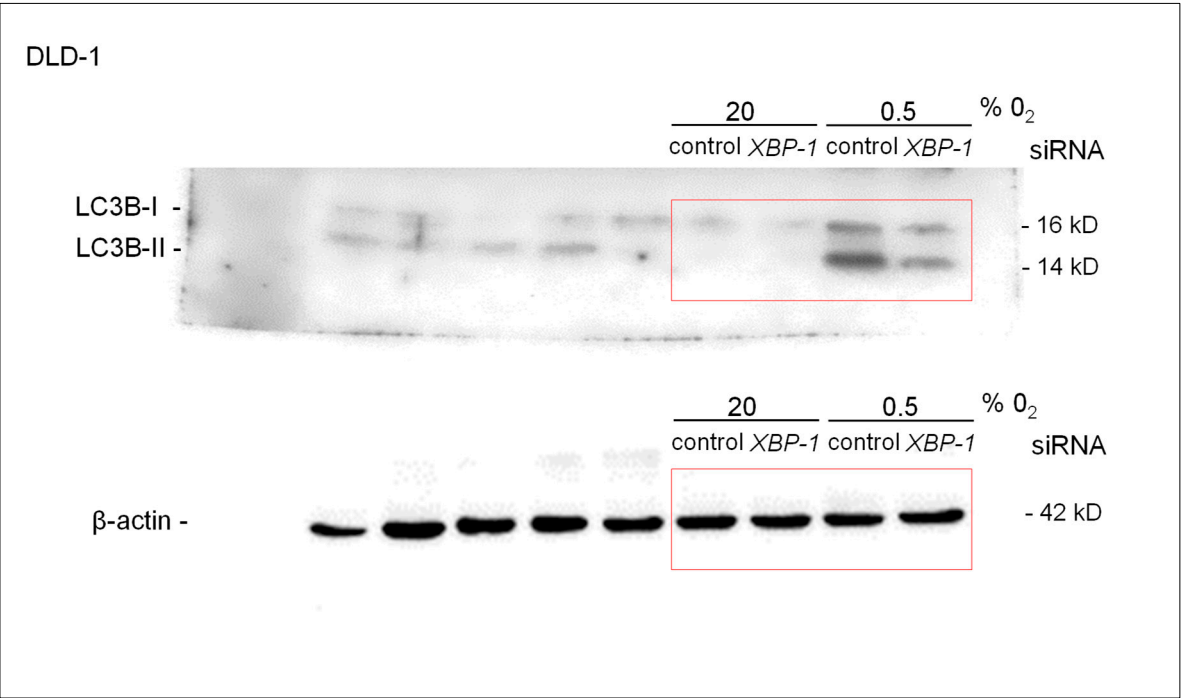

Related to Figure S1a

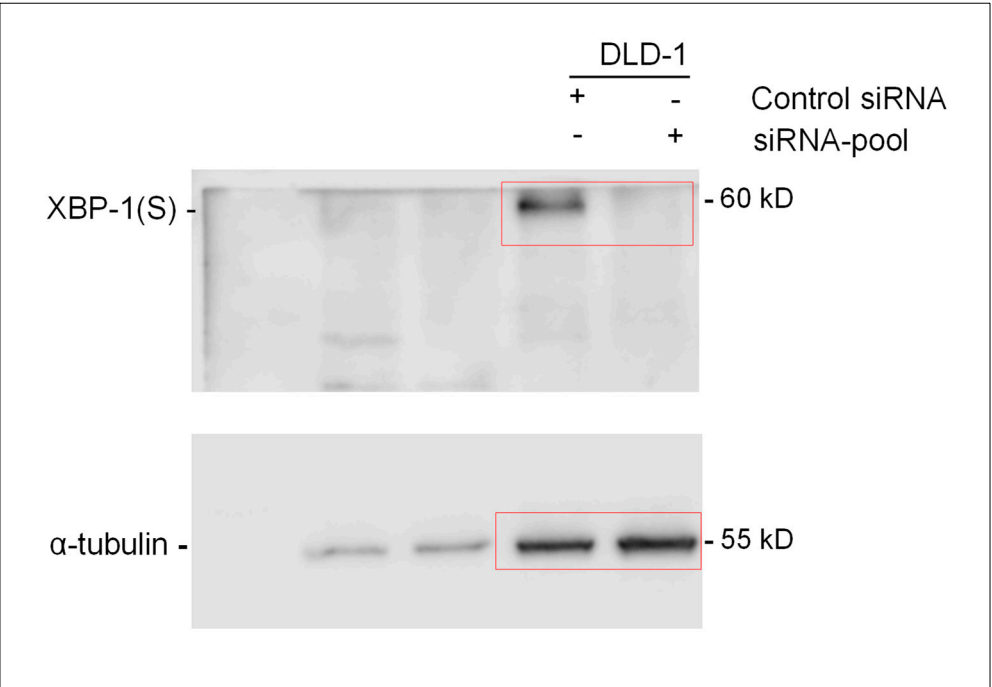

**Related to Figure S1d**

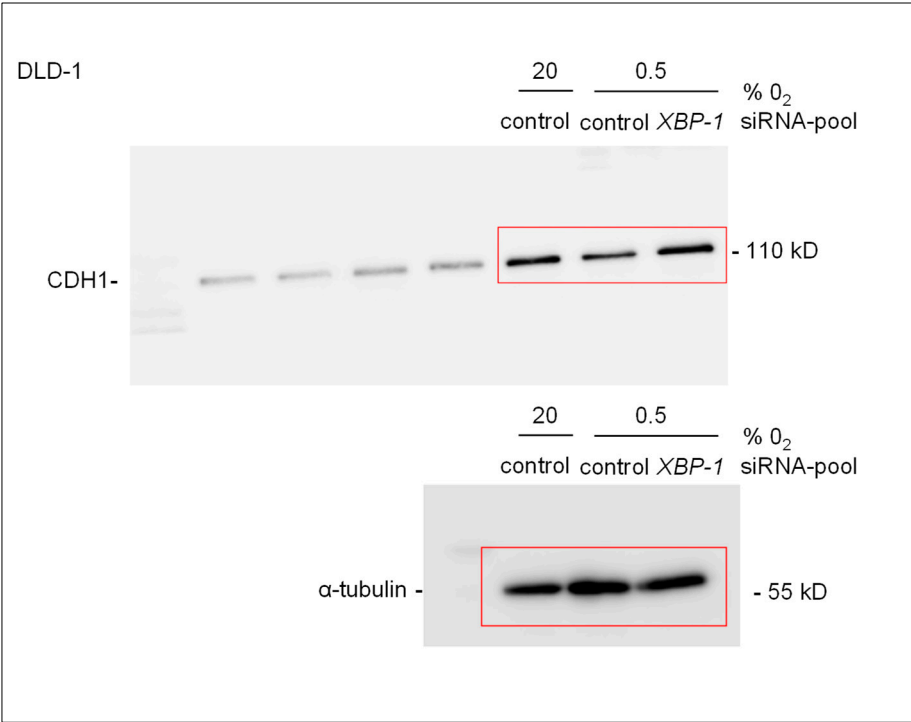

**Related to Figure S2e**

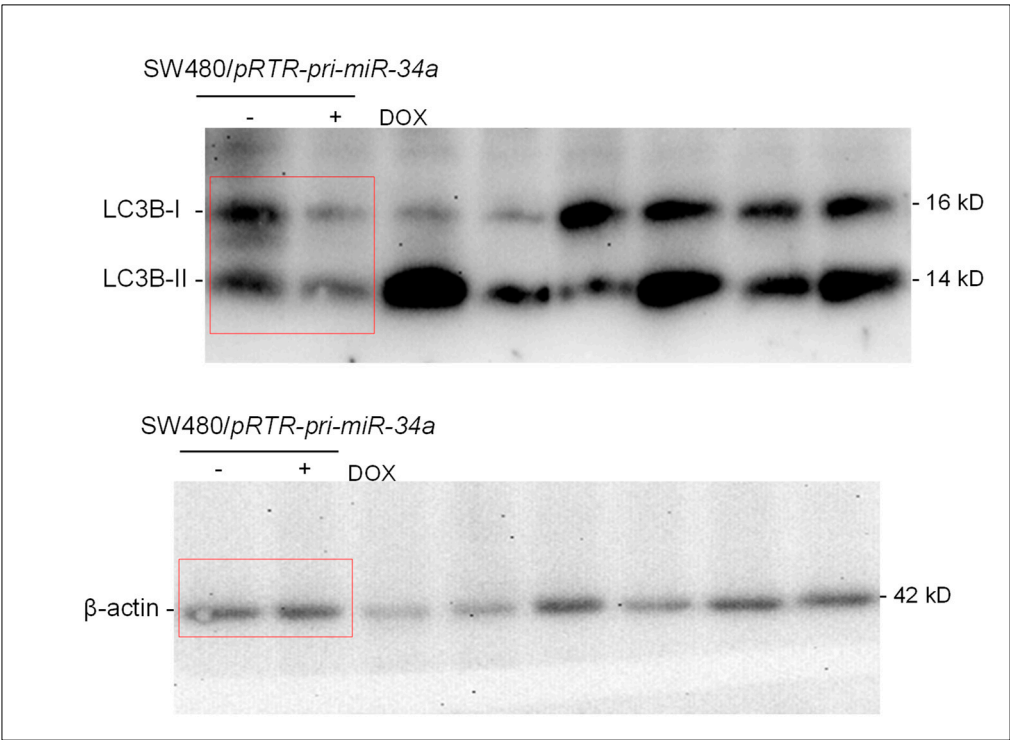

Related to Figure S2f

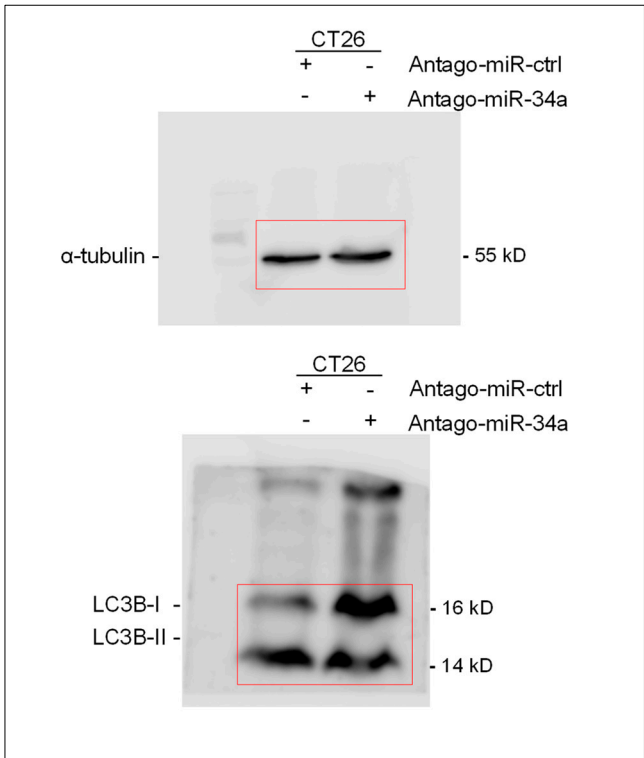



**Supplementary Table S1: Oligonucleotides used for quantitative real-time PCR analyses**

| gene                    | forward (5' – 3')     | reverse (5' – 3')     |
|-------------------------|-----------------------|-----------------------|
| human <i>GAPDH</i>      | GTTGCCATCAATGACCCCTT  | CTCCACGACGTACTCAGCG   |
| human <i>XPB-1</i>      | AAGCCAAGGGGAATGAAGT   | CCAGAATGCCCAACAGGATA  |
| human <i>XPB1-(S)</i>   | GCTGAGTCCGCAGCAGGTG   | GCTGGCAGGCTCTGGGGAAG  |
| human <i>IRE1A</i>      | CGGGAGAACATCACTGTCCC  | CCCGGTAGTGGTGCTTCTTA  |
| human <i>pri-miR34a</i> | CGTCACCTCTTAGGCTTGGA  | CATTGGTGTCTGTTGTGCT   |
| human <i>VIMENTIN</i>   | TACAGGAAGCTGCTGGAAGG  | ACCAGAGGGAGTGAATCCAG  |
| human <i>SNAIL</i>      | GCACATCCGAAGCCACAC    | GGAGAAGGTCCGAGCACAC   |
| human <i>SLUG</i>       | GGGGAGAAGCCTTTTTCTTG  | TCCTCATGTTTGTGCAGGAG  |
| mouse <i>Xbp-1(S)</i>   | CTGAGTCCGCAGCAGGT     | TGTCAGAGTCCATGGGAAGA  |
| mouse <i>Ire1a</i>      | CCGAGCCATGAGAAACAAGAA | GGGAAGCGGGAAGTGAAGTAG |
| mouse <i>TUBULIN</i>    | AGTAAACCGTAGCCATGAGG  | CCTCCCAGAACTTAGCACC   |

**Supplemental Table S2: List of antibodies**

**Primary antibodies**

| epitope           | source | company        | catalog no. | use     | dilution mouse | dilution human |
|-------------------|--------|----------------|-------------|---------|----------------|----------------|
| $\alpha$ -Tubulin | mouse  | Sigma-Aldrich  | #T9026      | WB      | 1:1000         | 1:1000         |
| B-actin           | rabbit | Sigma Aldrich  | # A2066     | WB      | 1:1000         | 1:1000         |
| E-cadherin        | mouse  | Invitrogen     | # 334000    | IF      |                | 1:50           |
| XPB-1U (29 kda)   | rabbit | Cell signaling | #12782      | WB      | 1:1000         | 1:1000         |
| XPB-1S( 56 kda)   | rabbit | Cell signaling | #12782      | WB, IHC | 1:1000, 1:500  | 1:1000         |
| IRE1A             | rabbit | Cell signaling | #3294       | WB      | 1:1000         | 1:1000         |
| IRE1A (pS724)     | rabbit | abcam          | ab124945    | WB      |                | 1:500          |
| Vimentin          | rabbit | Cell signaling | #5741       | WB      |                | 1:1000         |
| LC3B              | rabbit | Cell signaling | #2775       | WB, IF  | 1:1000, 1:500  | 1:1000         |

WB: Western Blotting; IHC: Immunohistochemistry; IF: Immunofluorescence

**Secondary antibodies or conjugates**

| name                                   | source | company       | catalog no. | use     | dilution |
|----------------------------------------|--------|---------------|-------------|---------|----------|
| anti-mouse HRP                         | goat   | Promega       | #W4021      | WB      | 1:1000   |
| anti-rabbit HRP                        | goat   | Sigma Aldrich | #A0545      | WB, ICH | 1:1000   |
| Alexa Flour 555 conjugated anti-rabbit | goat   | Invitrogen    | #A11034     | IF      | 1:500    |
| Alexa Flour 555 conjugated anti-mouse  | goat   | Invitrogen    | #A21422     | IF      | 1:500    |

WB: Western Blotting; IHC: Immunohistochemistry; IF: Immunofluorescence

**Supplemental Table S3: Oligonucleotides used for qChIP**

| gene         | forward (5' – 3')         | reverse (5' – 3')       |
|--------------|---------------------------|-------------------------|
| <i>16q22</i> | CTACTCACTTATCCATCCAGGCTAC | ATTCACACACTCAGACATCACAG |
| <i>UPRE</i>  | TCGCATCTTGTTGAATCCGG      | AGGGCCTCTCGCCTGGA       |

**Supplemental Table S4: Oligonucleotides used for cloning and mutagenesis of *XBP-1* and *IRE1A* 3'UTRs**

| gene                            | forward (5' – 3')                             | reverse (5' – 3')                             |
|---------------------------------|-----------------------------------------------|-----------------------------------------------|
| Human <i>XBP-1</i> 3'UTR        | GGACTAGTCCACATATATACCAAGCCCC                  | CGAGCTCCAGAAGCTACACTAGCAGG                    |
| Human <i>XBP-1</i> 3'UTR mutant | CTGCTTTTCATCCAGCTCGCGAGCAAAGC<br>CATCTTCCTG   | CAGGAAGATGGCTTTGCTCGC<br>GAGCTGGATGAAAGCAG    |
| Human <i>IRE1A</i> 3'UTR        | GGACTAGTCTCCTGGCAGGAAGTCATCAG                 | CGAGCTCCCTTTATTGTGGTT<br>GGCTCGAC             |
| Human <i>IRE1A</i> 3'UTR mutant | CCCTTTTCCTTGACTATTACACGTGGTGGA<br>GGATAGCAGAG | CTCTGCTATCCTCCACCACGT<br>GTAATAGTCAAGGAAAAGGG |

**Supplemental Table S5: Vectors used in this study**

| Name                    | Insert                   | Reference |
|-------------------------|--------------------------|-----------|
| pRTR                    | /                        | [40]      |
| pRTR/ <i>p53</i> -VSV   | human <i>TP53</i>        | [41]      |
| pRTR/ <i>pri-miR34a</i> | human <i>pri-miR-34a</i> | [42]      |
